# Supplementary material for: Involvement of ABA Responsive SVB Genes in the Regulation of Trichome Formation in Arabidopsis
Source: MDPI journal article supplement (doi:10.3390/ijms22136790), 2021-06-24
Supplement: s1 [file s1]

**Table S1.** Primers used in this study.

| Primers                    | Sequences (5'-3')                           |
|----------------------------|---------------------------------------------|
| <i>SVB-F-NdeI</i>          | CAACATATGGGTTTGGTTACAGATGAAGT               |
| <i>SVB-R-SacI</i>          | CAAGAGCTCCTAAGCATCTGTGACTGCAAC              |
| <i>SVB2-F-NdeI</i>         | CAACATATGGGTTTGGTTACAGAGG                   |
| <i>SVB2-R-SacI</i>         | CAAGAGCTCTTAGGCCGCTCTTTGA                   |
| <i>SVB3-F-NdeI</i>         | CAACATATGTCGTCTCAAGAAACGAA                  |
| <i>SVB3-R-SacI</i>         | CAAGAGCTCTCATTTCGTCTTCTTCAAAAGC             |
| <i>SVB4-F-NdeI</i>         | CAACATATGGCGTTAAGAGAGATGATA                 |
| <i>SVB4-R-AflII</i>        | CAACTTAAGTTACATCAAGGAAGTCTGGTTAC            |
| <i>SVB5-F-NdeI</i>         | CAACATATGGCGAGCGAGGGAGTTGT                  |
| <i>SVB5-R-AflII</i>        | CAACTTAAGTTAGTTTTTGGGATTCTCCAA              |
| <i>SVB6-F-NdeI</i>         | CAACATATGGTGACAGAAGCCATG                    |
| <i>SVB6-R-SacI</i>         | CAAGAGCTCTTAGTACAAATAGATTTTGGTTTTG          |
| <i>DT1-BsF (SVB)</i>       | ATATATGGTCTCGATTGCGCCACCGAGGTCATTGCACGTT    |
| <i>DT1-F0 (SVB)</i>        | TCGCCACCGAGGTCATTGCACGTTTTAGAGCTAGAAATAGC   |
| <i>DT2-R0 (SVB)</i>        | AACGGACAGACCAGTTGGTGTCCAATCTCTTAGTCGACTCTAC |
| <i>DT2-BsR (SVB)</i>       | ATTATTGGTCTCGAAACGGACAGACCAGTTGGTGTCCAA     |
| <i>DT1-BsF (SVB2)</i>      | ATATATGGTCTCGATTGTTGGGTATGACAGAGAGTCGTT     |
| <i>DT1-F0 (SVB2)</i>       | TGTTGGGTATGACAGAGAGTCGTTTTAGAGCTAGAAATAGC   |
| <i>DT2-R0 (SVB2)</i>       | AACTGGCTTTGACTCCAGTGAGCAATCTCTTAGTCGACTCTAC |
| <i>DT2-BsR (SVB2)</i>      | ATTATTGGTCTCGAAACTGGCTTTGACTCCAGTGAGCAA     |
| <i>DT1-BsF (SVB3)</i>      | ATATATGGTCTCGATTGAAGGAGCAGAGATCTGCAAGTT     |
| <i>DT1-F0 (SVB3)</i>       | TGAAGGAGCAGAGATCTGCAAGTTTTAGAGCTAGAAATAGC   |
| <i>DT2-R0 (SVB3)</i>       | AACAAATCAAAATCTCTTTGCTCAATCTCTTAGTCGACTCTAC |
| <i>DT2-BsR (SVB3)</i>      | ATTATTGGTCTCGAAACAAATCAAAATCTCTTTGCTCAA     |
| <i>DT1-BsF (SVB4)</i>      | ATATATGGTCTCGATTGCTCTCATCAAACCTACCCACGTT    |
| <i>DT1-F0 (SVB4)</i>       | TGCTCTCATCAAACCTACCCACGTTTTAGAGCTAGAAATAGC  |
| <i>DT2-R0 (SVB4)</i>       | AACCAACAAACGCAGTTATCTCCAATCTCTTAGTCGACTCTAC |
| <i>DT2-BsR (SVB4)</i>      | ATTATTGGTCTCGAAACCAACAAACGCAGTTATCTCCAA     |
| <i>DT1-BsF (SVB5)</i>      | ATATATGGTCTCGATTGGAGATCGTGTACGGGGCGGGTT     |
| <i>DT1-F0 (SVB5)</i>       | TGGAGATCGTGTACGGGGCGGGTTTTAGAGCTAGAAATAGC   |
| <i>DT2-R0 (SVB5)</i>       | AACGTAACGGGGAAAGACCTGCCAATCTCTTAGTCGACTCTAC |
| <i>DT2-BsR (SVB5)</i>      | ATTATTGGTCTCGAAACGTAACGGGGAAAGACCTGCCAA     |
| <i>DT1-BsF (SVB6)</i>      | ATATATGGTCTCGATTGGTTCGCTTTTATCCGAAATGTT     |
| <i>DT1-F0 (SVB6)</i>       | TGGTTCGCTTTTATCCGAAATGTTTTAGAGCTAGAAATAGC   |
| <i>DT2-R0 (SVB6)</i>       | AACTGAACTCCTTAGCCTTAACCAATCTCTTAGTCGACTCTAC |
| <i>DT2-BsR (SVB6)</i>      | ATTATTGGTCTCGAAACTGAACTCCTTAGCCTTAACCAA     |
| <i>SVB3-TG1-gRT#+</i>      | AAGGAGCAGAGATCTGCAAGTTTTAGAGCTAGAAAT        |
| <i>SVB3-TG1-AtU6-29T#-</i> | TTGCAGATCTCTGCTCCTTCAATCTCTTAGTCGACT        |
| <i>SVB3-TG2-gRT#+</i>      | AGCAAAGAGATTTTGATTTGTTTTAGAGCTAGAAAT        |
| <i>SVB3-TG2-AtU6-1T#-</i>  | AAATCAAAATCTCTTTGCTCAATCACTACTTCGTCT        |
| <i>SVB4-TG1-gRT#+</i>      | CTCTCATCAAACCTACCCACGTTTTAGAGCTAGAAAT       |
| <i>SVB4-TG1-AtU6-1T#-</i>  | GTGGGTAGTTTGATGAGAGCAATCACTACTTCGTCT        |
| <i>SVB4-TG2-gRT#+</i>      | GAGATAACTGCGTTTGTGGTTTTAGAGCTAGAAAT         |
| <i>SVB4-TG2-AtU6-26T#-</i> | CAACAAACGCAGTTATCTCCAATCACTACTTCGACTC       |
